# Supplementary material for: A 1 : 1 intercluster compound consisting of +6 and −6 charged RhIII4ZnII4 octanuclear cations and anions with aminothiolate ligands
Source: Royal Society of Chemistry journal article supplement (doi:10.1039/c3ce41800f), 2013-01-01
Supplement: c3ce41800f.pdf [file c3ce41800f.pdf]

## Electronic Supplementary Information (ESI)

A 1:1 intercluster compound consisting of +6 and –6 charged  $\text{Rh}^{\text{III}}_4\text{Zn}^{\text{II}}_4$  octanuclear cations and anions with aminothiolate ligands

Nobuto Yoshinari, Ukyo Yamashita and Takumi Konno

*Department of Chemistry, Graduate School of Science, Osaka University,*

*Toyonaka, Osaka 560-0043, Japan*

*E-mail: konno@chem.sci.osaka-u.ac.jp*

## Experimental Section.

### Preparation of compounds.

$(\Delta)_4\text{-K}_6[\text{Zn}_4\text{O}\{\text{Rh}(\text{L-cys})_3\}_4]$  ( $(\Delta)_4\text{-K}_6[1]$ ) and  $(\Delta)_4/(\Lambda)_4\text{-}[\text{Zn}_4\text{O}\{\text{Rh}(\text{aet})_3\}_4]\text{Br}_6$  ( $(\Delta)_4/(\Lambda)_4\text{-}[2]\text{Br}_6$ ). These complexes were prepared as described in the literature.<sup>11</sup> For  $(\Delta)_4\text{-K}_6[1]$ : Anal. Calcd for  $\text{K}_6[1]\cdot 47.5\text{H}_2\text{O} = \text{C}_{36}\text{H}_{155}\text{N}_{12}\text{O}_{72.5}\text{Rh}_4\text{S}_{12}\text{Zn}_4$ : C, 13.47; H, 4.87; N, 5.24%. Found: C, 13.18; H, 4.58; N, 5.10%. For  $(\Delta)_4/(\Lambda)_4\text{-}[2]\text{Br}_6$ : Anal. Calcd for  $[2]\cdot\text{Br}_6\cdot\text{NaBr}\cdot 8\text{H}_2\text{O} = \text{C}_{24}\text{H}_{88}\text{Br}_7\text{N}_{12}\text{Na}_1\text{O}_9\text{Rh}_4\text{S}_{12}\text{Zn}_4$ : C, 12.38; H, 3.81; N, 7.22%. Found: C, 12.33; H, 3.76; N, 6.97%.

$(\Delta)_4\text{-}[\text{Zn}_4\text{O}\{\text{Rh}(\text{aet})_3\}_4](\text{NO}_3)_6$  ( $[2](\text{NO}_3)_6$ ). To a solution containing  $(\Delta)_4\text{-}[\text{Zn}_3\text{OH}\{\text{Rh}(\text{aet})_3\}_4](\text{NO}_3)_5$ <sup>S1</sup> (27 mg, 15  $\mu\text{mol}$ ) in water (10 mL) was added an aqueous solution of  $\text{Zn}(\text{NO}_3)_2$  (66 mM, 0.22 mL, 14  $\mu\text{mol}$ ). The mixture was heated at 50°C for 2.5 h and then evaporated to dryness. The orange-yellow residue was dissolved in water (2 mL) and filtered off, followed by the addition of several drops of a saturated aqueous solution of  $\text{NaNO}_3$  to the filtrate. After the orange solution was stood in a refrigerator for a week, the resulting yellow crystalline powder was collected by filtration. Yield: 10 mg (32%). Anal. Calcd for  $[2](\text{NO}_3)_6\cdot 5\text{H}_2\text{O} = \text{C}_{24}\text{H}_{82}\text{N}_{18}\text{O}_{24}\text{Rh}_4\text{S}_{12}\text{Zn}_4$ : C, 13.96; H, 4.00; N, 12.21%. Found: C, 13.91; H, 3.96; N, 12.17%.

### $(\Delta)_4/(\Lambda)_4\text{-}[\text{Zn}_4\text{O}\{\text{Rh}(\text{aet})_3\}_4](\Delta)_4\text{-}[\text{Zn}_4\text{O}\{\text{Rh}(\text{L-cys})_3\}_4]$ (**3**)

A solution containing  $(\Delta)_4\text{-K}_6[1]\cdot 49\text{H}_2\text{O}$  (26 mg, 10  $\mu\text{mol}$ ) in an aqueous  $\text{NaOAc}/\text{HOAc}$  buffer solution (75 mM, pH 4.5, 10 mL) was slowly layered under an aqueous  $\text{NaOAc}/\text{HOAc}$  buffer solution (75 mM, pH 4.5, 10 mL). Then, a solution containing  $(\Delta)_4/(\Lambda)_4\text{-}[2]\text{Br}_6\cdot\text{NaBr}\cdot 8\text{H}_2\text{O}$  (24 mg, 10  $\mu\text{mol}$ ) in an aqueous  $\text{NaOAc}/\text{HOAc}$  buffer solution (7.5 mM, pH 4.5, 10 mL) was layered on the top of the two-layered solution. The three-layered solution was stood at room temperature for 2 weeks, and the resulting yellow block crystals were collected by filtration. Yield: 19 mg (44%). Anal. Calcd for  $[2][1]\cdot 35\text{H}_2\text{O} = \text{C}_{60}\text{H}_{202}\text{N}_{24}\text{O}_{61}\text{Rh}_8\text{S}_{24}\text{Zn}_8$ : C, 16.56; H, 4.68; N, 7.72%. Found: C, 16.37; H, 4.59; N, 7.51%. IR (KBr disk,  $\text{cm}^{-1}$ ): 1616 ( $\text{COO}^-$ ).

### $(\Delta)_4\text{-}[\text{Zn}_4\text{O}\{\text{Rh}(\text{aet})_3\}_4](\Delta)_4\text{-}[\text{Zn}_4\text{O}\{\text{Rh}(\text{L-cys})_3\}_4]$ (**3'**)

Yellow block crystals for **3'** was obtained by a method used for **3**, employing  $(\Delta)_4\text{-}[2](\text{NO}_3)_6\cdot 5\text{H}_2\text{O}$  instead of  $(\Delta)_4/(\Lambda)_4\text{-}[2]\text{Br}_6\cdot\text{NaBr}\cdot 8\text{H}_2\text{O}$  in a half scale. Yield: 12

mg (56%). Anal. Calcd for  $[2][1] \cdot 40H_2O = C_{60}H_{212}N_{24}O_{66}Rh_8S_{24}Zn_8$ : C, 16.22; H, 4.81; N, 7.57%. Found: C, 15.93; H, 4.64; N, 7.38%.

### X-ray crystallography.

Single-crystal X-ray diffraction measurements were made on a Rigaku RAXIS VII or a Rigaku RAXIS-RAPID imaging plate area detectors with a graphite monochromated Mo-K $\alpha$  radiation. The intensity data were collected by the  $\omega$  scan mode. Empirical absorption corrections were applied. The structures were solved by a direct method using SHELXS-97.<sup>S2</sup> All calculations were performed by using the Yadokari-XG software package<sup>S3</sup> except for the refinement which was performed by using SHELXL-97.<sup>S2</sup>

For  $K_6[1]$ , five of six potassium ions were disordered into two positions, the occupancies of which were fixed to 0.5. The non-hydrogen atoms except for disordered atoms were refined anisotropically by full-matrix least-squares methods. Hydrogen atoms except those of water molecules were placed at calculated positions but were not refined.

For **3**, one cluster anion  $(\Delta)_4-[1]^{6-}$  and one cluster cation  $[2]^{6+}$ , besides solvated water molecules, were crystallographically independent. The cluster cation was disordered into two positions. Although not all C and N atoms in **3** were determined, the two disordered cation units were characterized as the  $(\Delta)_4$  and  $(\Lambda)_4$  isomers of  $[2]^{6+}$ . The crystallographic data of **3** were summarized in Table S1, and the cluster cation and anion found in **3** illustrated in Fig. S1.

For **3'**, two methylene groups of aet ligand of cationic cluster were disordered into two positions, the occupancies of which were refined. The non-hydrogen atoms except for disordered atoms were refined anisotropically by full-matrix least-squares methods. Hydrogen atoms except those of water molecules were placed at calculated positions but were not refined.

[S1] (a) S. Aizawa, Y. Sone, S. Yamada, M. Nakamura, *Chem. Lett.* 1998, 775. (b) T. Konno, K.

Haneishi, M. Hirotsu, T. Yamaguchi, T. Ito, T. Yoshimura, *J. Am. Chem. Soc.* 2003, **125**, 9244.

[S2] G. M. Sheldrick, *Acta Cryst.* 2008, **A64**, 112.

[S3] C. Kabuto, S. Akine, T. Nemoto and E. Kwon, *Yadokari-XG 2009, Program for the Refinement of Crystal Structures, Nihon Kessho Gakkaishi*, 2009, **51**, 218.

**Table S1.** Crystal data of **3**.

|                                                                              | <i>rac</i> -[ <b>2</b> ][ <b>1</b> ]·41H <sub>2</sub> O ( <b>3</b> )                                             |
|------------------------------------------------------------------------------|------------------------------------------------------------------------------------------------------------------|
| empirical formula                                                            | C <sub>60</sub> H <sub>132</sub> N <sub>24</sub> O <sub>67</sub> Rh <sub>8</sub> S <sub>24</sub> Zn <sub>8</sub> |
| fw                                                                           | 3508.77                                                                                                          |
| size / mm <sup>3</sup>                                                       | 0.12 x 0.12 x 0.08                                                                                               |
| crystal system                                                               | Orthorhombic                                                                                                     |
| space group                                                                  | <i>P</i> 2 <sub>1</sub> 2 <sub>1</sub> 2 <sub>1</sub> (No.19)                                                    |
| <i>a</i> / Å                                                                 | 24.113(2)                                                                                                        |
| <i>b</i> / Å                                                                 | 26.524(2)                                                                                                        |
| <i>c</i> / Å                                                                 | 28.3341(17)                                                                                                      |
| <i>V</i> / Å <sup>3</sup>                                                    | 18122(3)                                                                                                         |
| <i>Z</i>                                                                     | 4                                                                                                                |
| <i>T</i> / K                                                                 | 200(2)                                                                                                           |
| <i>R</i> (int)                                                               | 0.1978                                                                                                           |
| $\rho_{\text{calcd.}}$ / g cm <sup>-3</sup>                                  | 1.681                                                                                                            |
| $\mu$ (Mo Ka), mm <sup>-1</sup>                                              | 2.103                                                                                                            |
| 2 $\theta_{\text{Max}}$                                                      | 55.0                                                                                                             |
| total no. of data                                                            | 173199                                                                                                           |
| no. of unique data                                                           | 41471                                                                                                            |
| no. of parameters                                                            | 1300                                                                                                             |
| flack                                                                        | 0.069(19)                                                                                                        |
| <i>R</i> ( <i>I</i> >2 $\sigma$ ( <i>I</i> )) <sup>a</sup>                   | 0.0981                                                                                                           |
| <i>R</i> w <sup>b</sup>                                                      | 0.2831                                                                                                           |
| <sup>a</sup> $R_1 = \Sigma( F_o  -  F_c ) / \Sigma(F_o)$ .                   |                                                                                                                  |
| <sup>b</sup> $R_w = [\Sigma w(F_o^2 - F_c^2)^2 / \Sigma w(F_o^2)^2]^{1/2}$ . |                                                                                                                  |

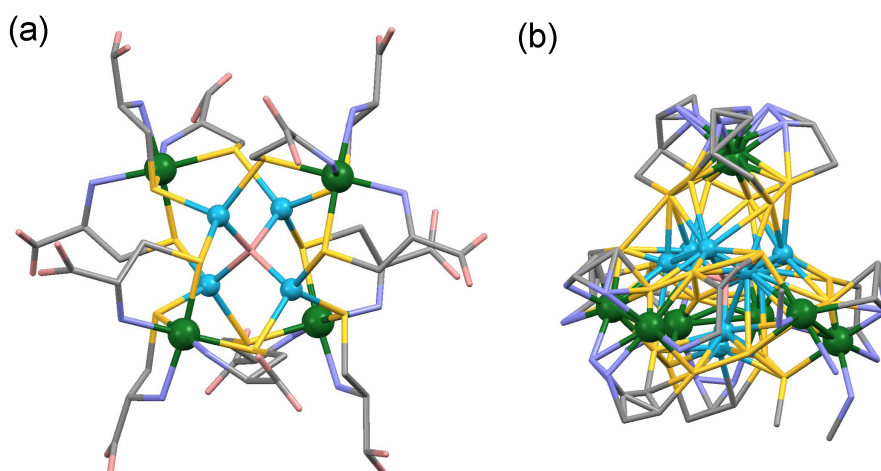

**Fig. S1.** Molecular structure of (a) the cluster anion and (b) the cluster cation in **3**.  
Color code; Rh: blue-green, Zn: blue gray, S: yellow, O: pink, N: blue, C: gray.

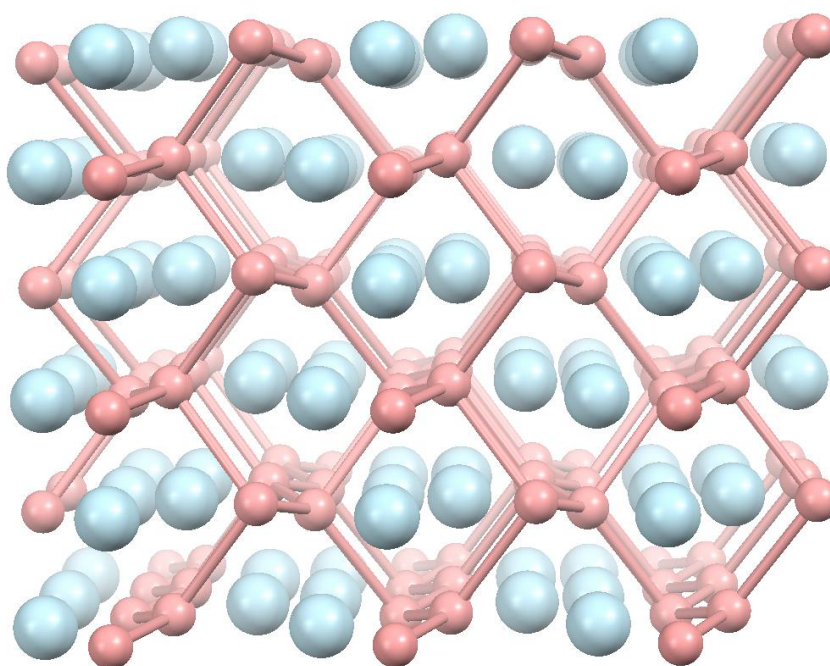

**Fig. S2.** A schematic drawing of the packing structure of **3'**. The **dia** net of the cluster anions ( $[1]^{6-}$ ; pink) accommodates cluster cations ( $[2]^{6+}$ ; blue) in its cavities.

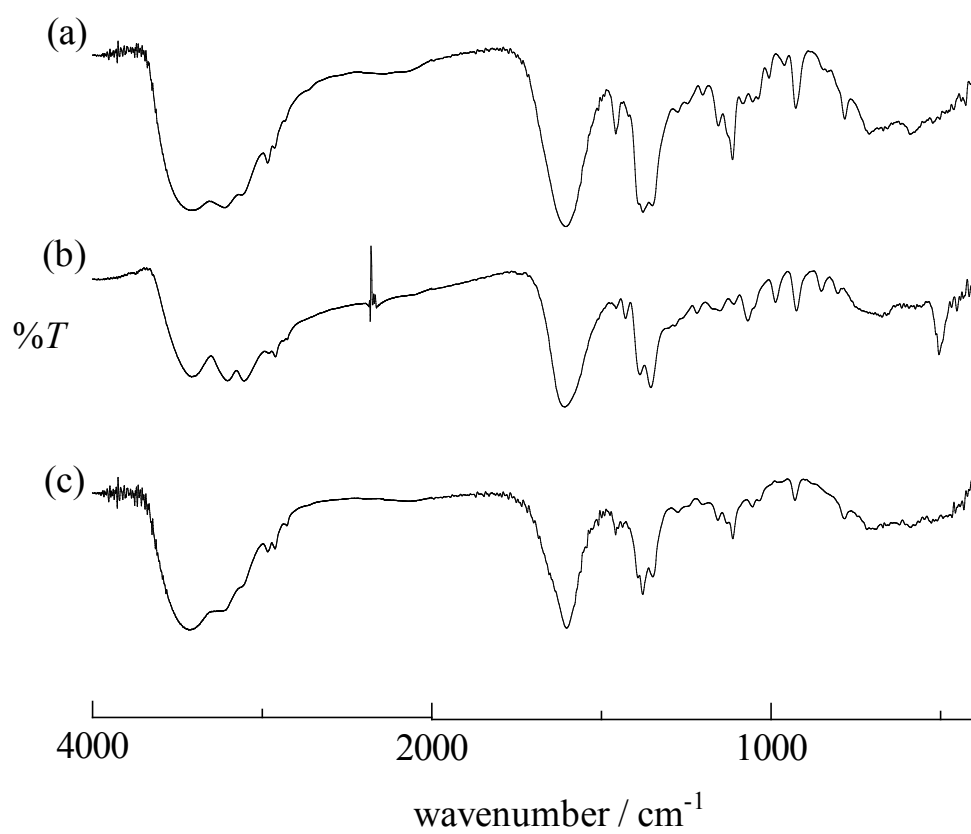

**Fig. S3.** IR spectra of (a)  $(\Delta)_4\text{-K}_6[1]$ , (b) **3**, and (c) **3'** (KBr disks).
